# Supplementary figures and images for: A unifying mechanism governing inter-brain neural relationship during social interactions
Source: eLife journal article supplement (doi:10.7554/elife.70493), 2022-02-10

**Figure 1 - figure supplement 1**

**A**

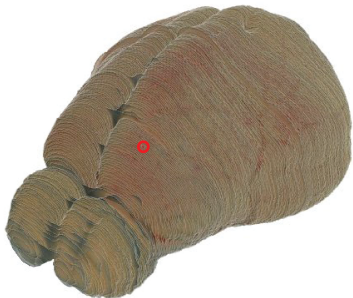

**B**

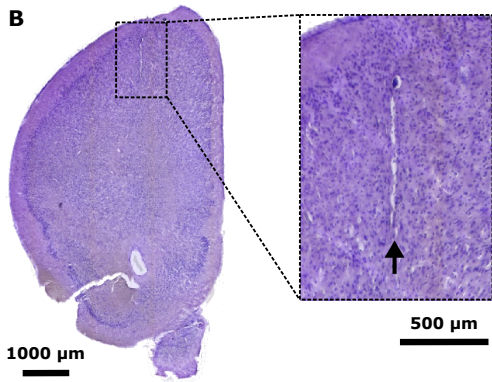

Supplement: supp [file elife_poa_e70493_Figure_1_figure_supplement_1.pdf › elife_poa_e70493_Figure_1_figure_supplement_1.pdf]

**Figure 1 - figure supplement 2**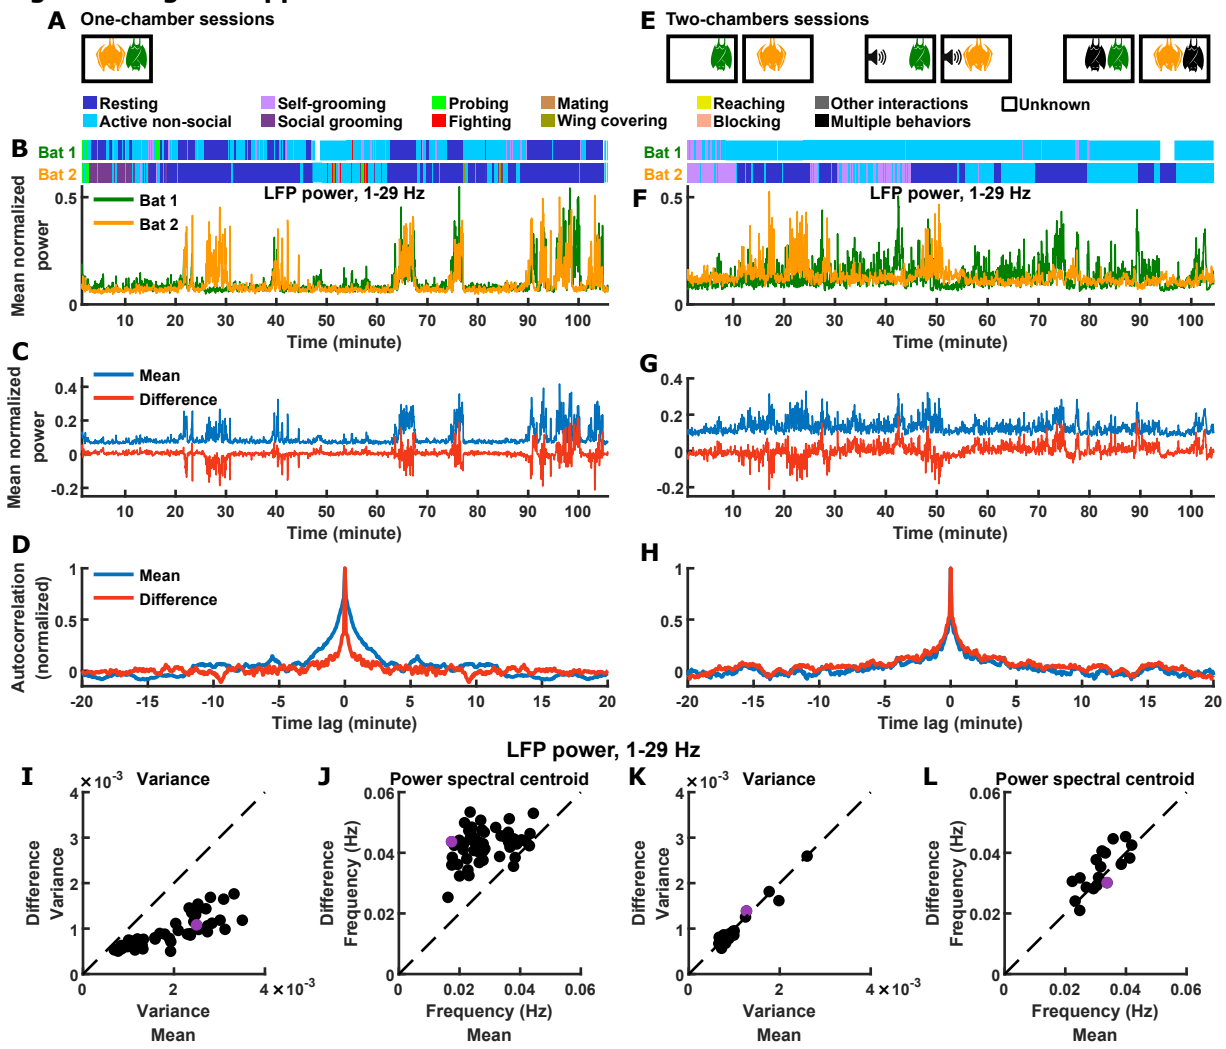

Supplement: supp [file elife_poa_e70493_Figure_1_figure_supplement_2.pdf › elife_poa_e70493_Figure_1_figure_supplement_2.pdf]

# Figure 1 - figure supplement 3

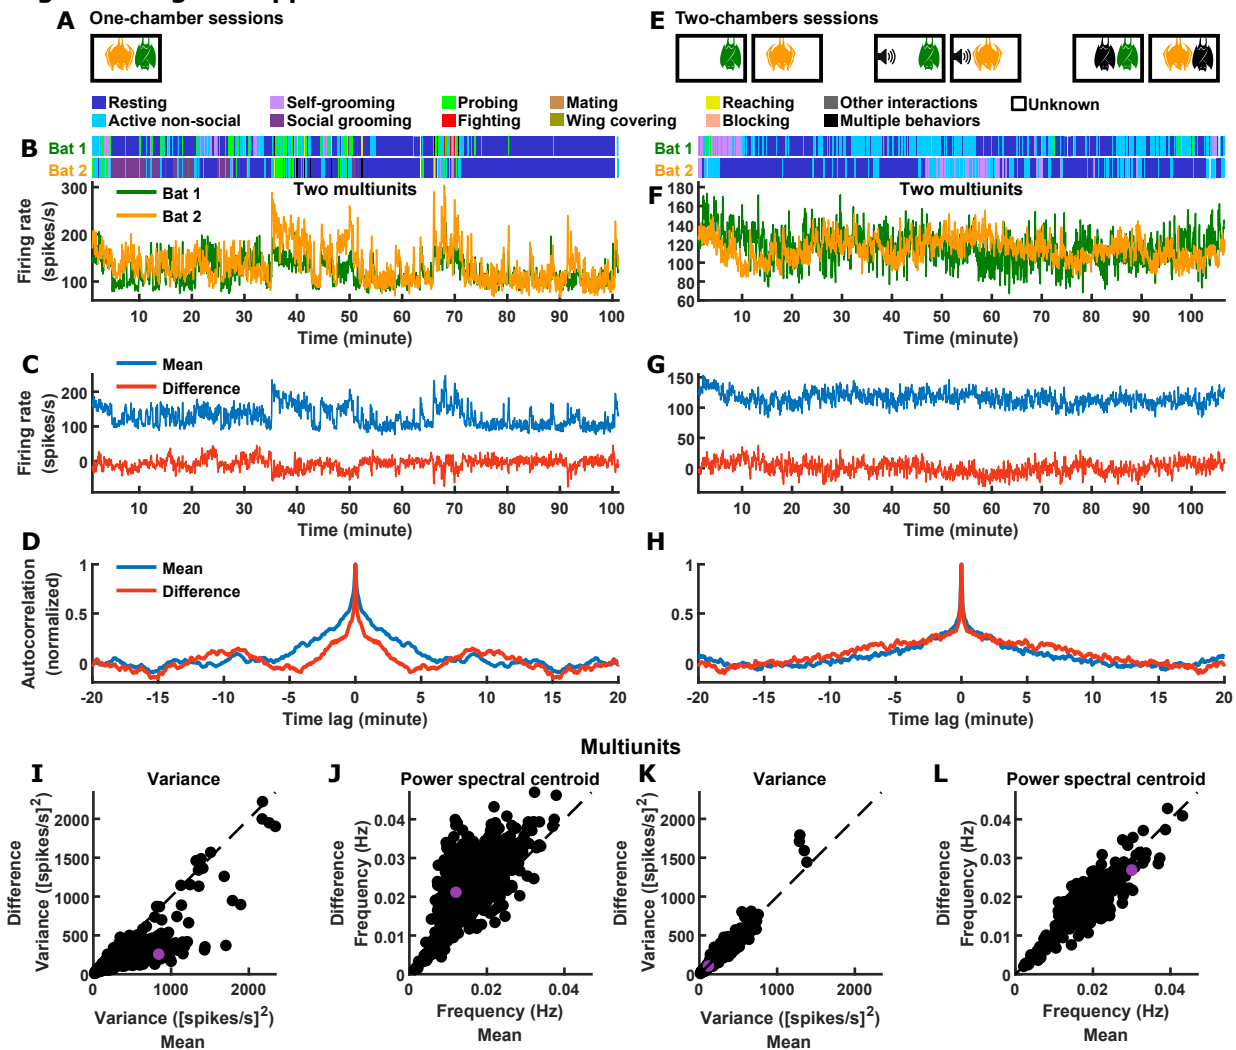

Supplement: supp [file elife_poa_e70493_Figure_1_figure_supplement_3.pdf › elife_poa_e70493_Figure_1_figure_supplement_3.pdf]

**Figure 1 - figure supplement 4**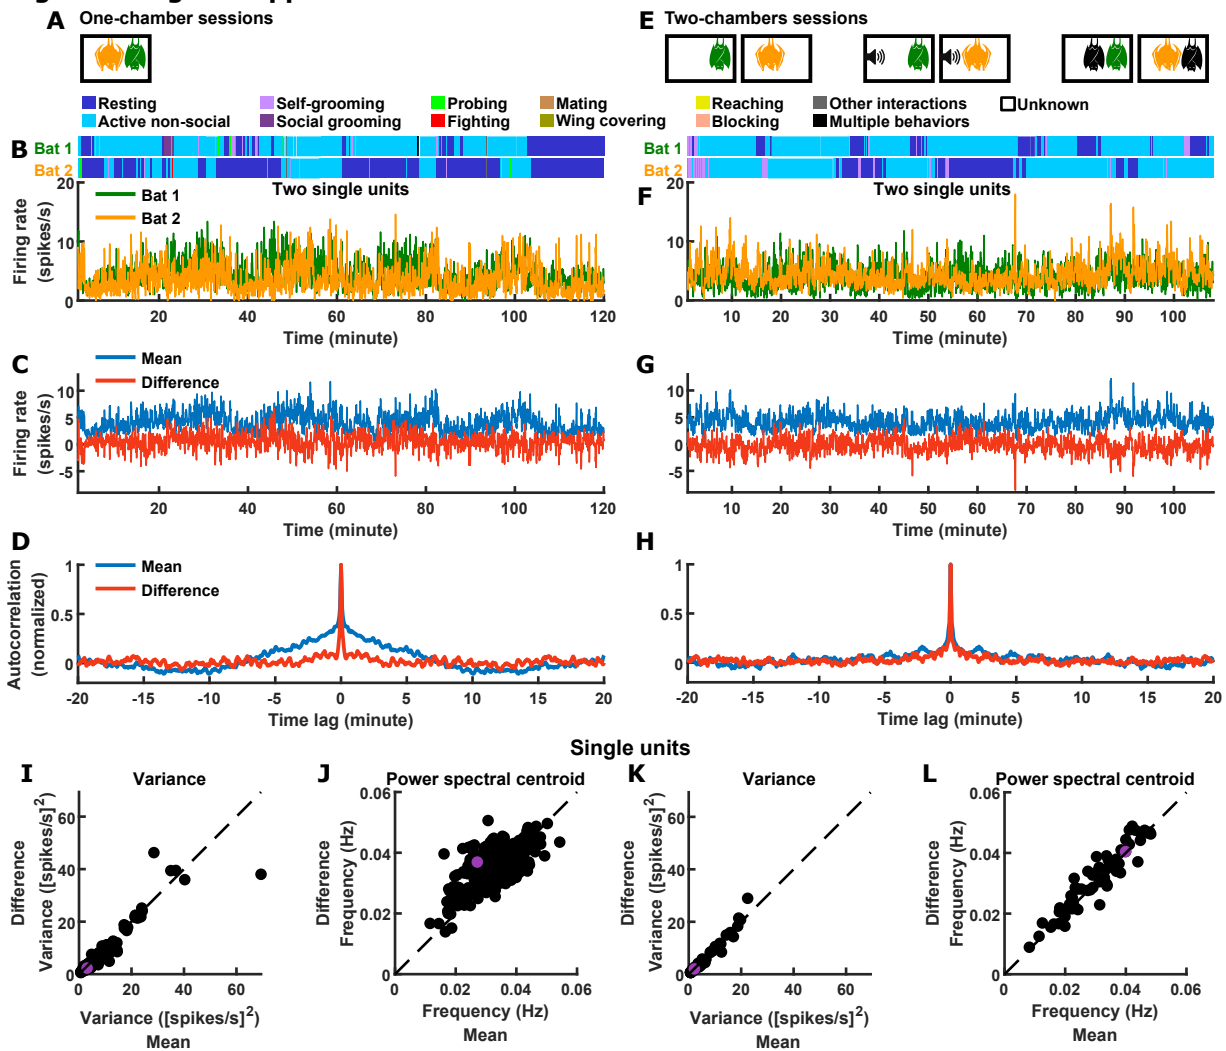

Supplement: supp [file elife_poa_e70493_Figure_1_figure_supplement_4.pdf › elife_poa_e70493_Figure_1_figure_supplement_4.pdf]

# Figure 3 - figure supplement 1

## Simulation of example experimental session

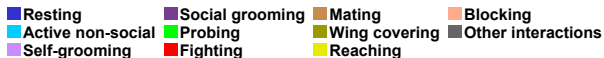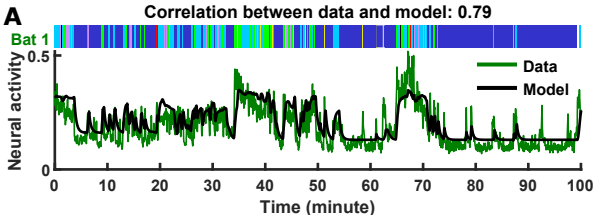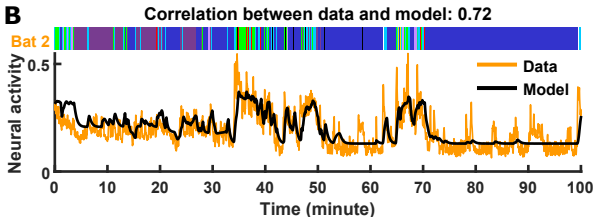

Supplement: supp [file elife_poa_e70493_Figure_3_figure_supplement_1.pdf › elife_poa_e70493_Figure_3_figure_supplement_1.pdf]

**Figure 3 - figure supplement 2**

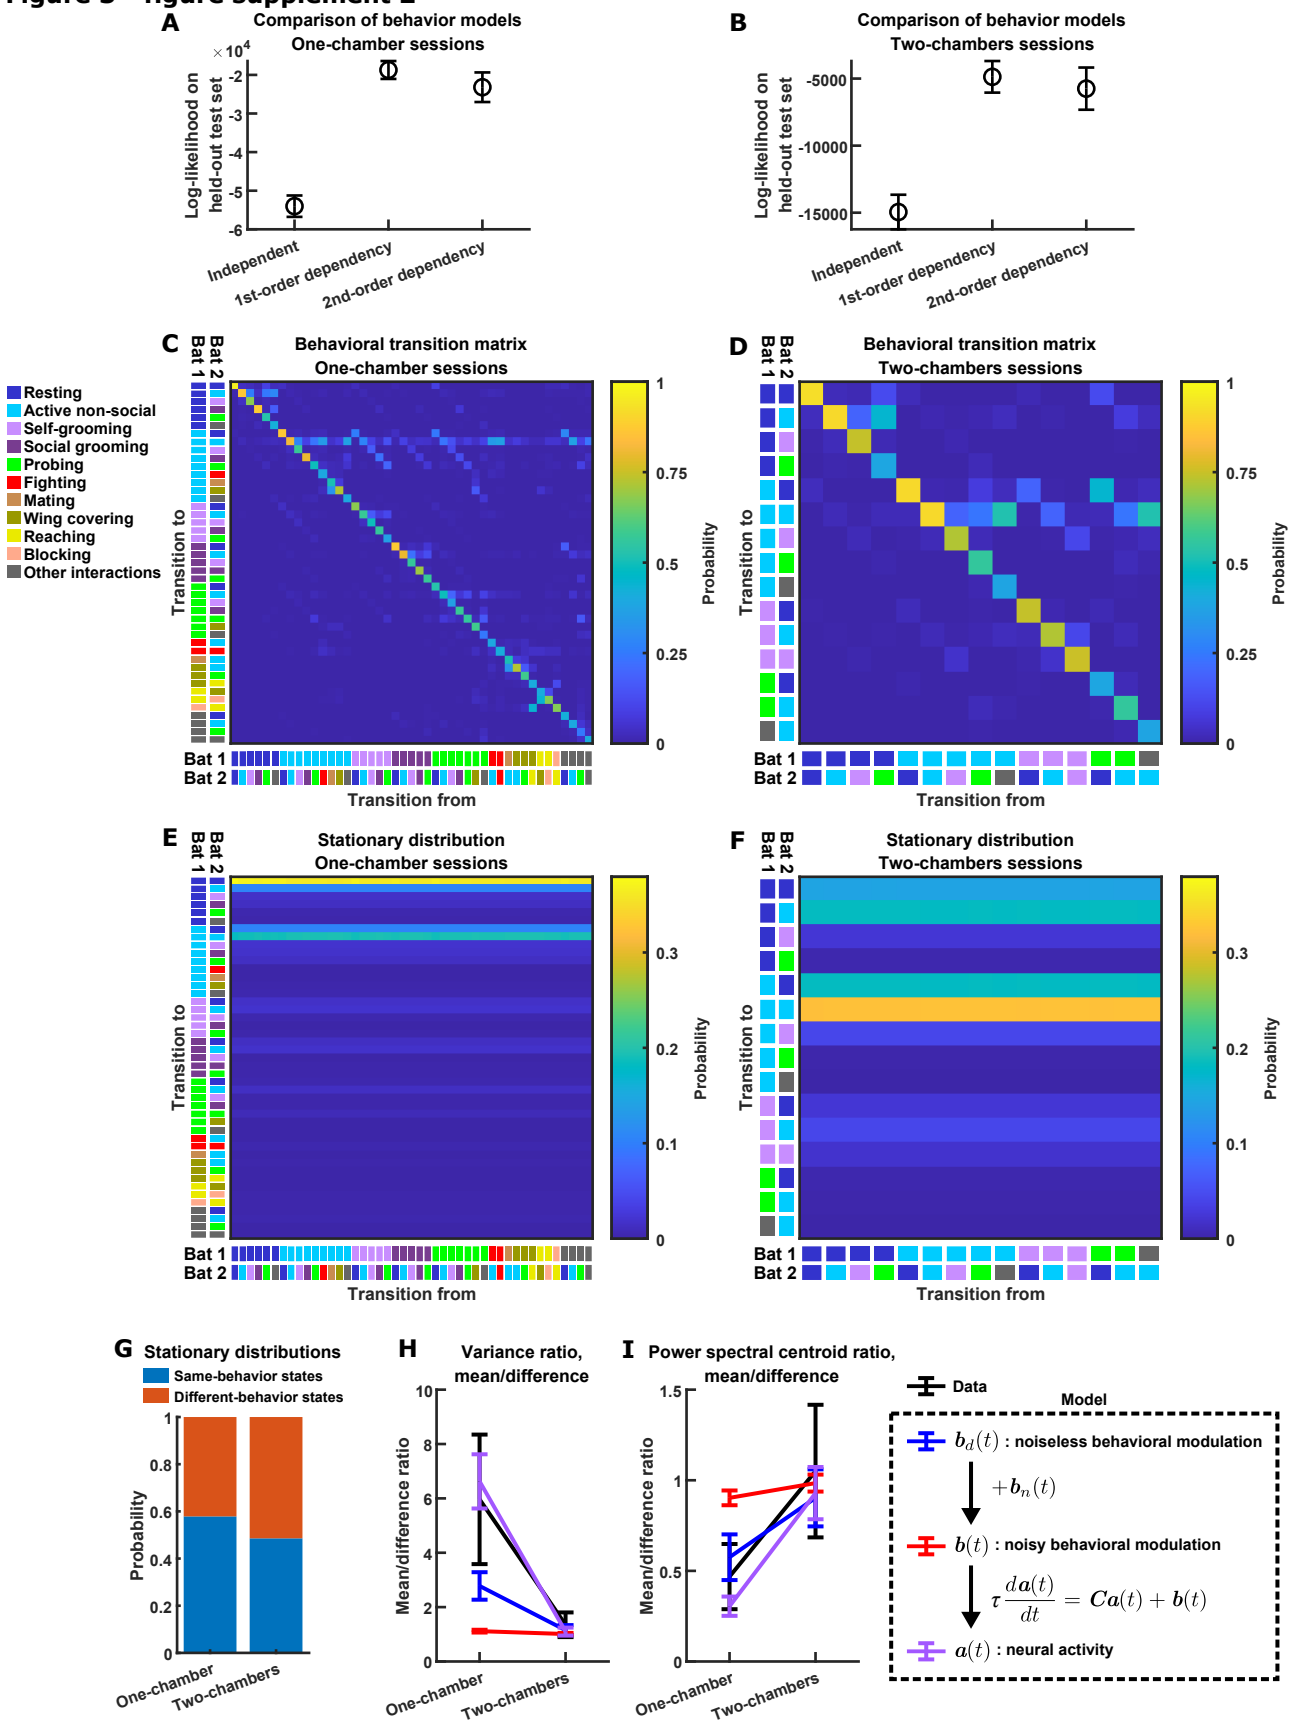

Supplement: supp [file elife_poa_e70493_Figure_3_figure_supplement_2.pdf › elife_poa_e70493_Figure_3_figure_supplement_2.pdf]

**Figure 4 - figure supplement 1**

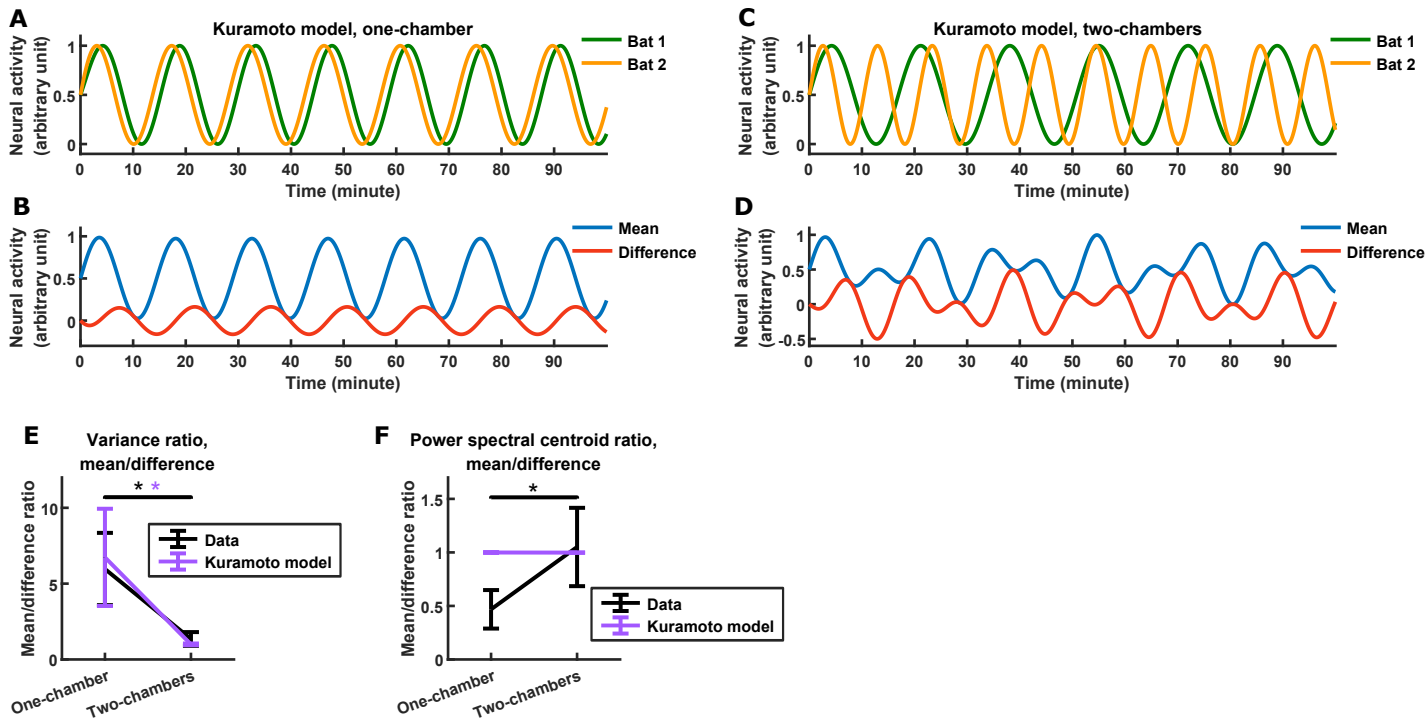

Supplement: supp [file elife_poa_e70493_Figure_4_figure_supplement_1.pdf › elife_poa_e70493_Figure_4_figure_supplement_1.pdf]

**Figure 5 - figure supplement 1**

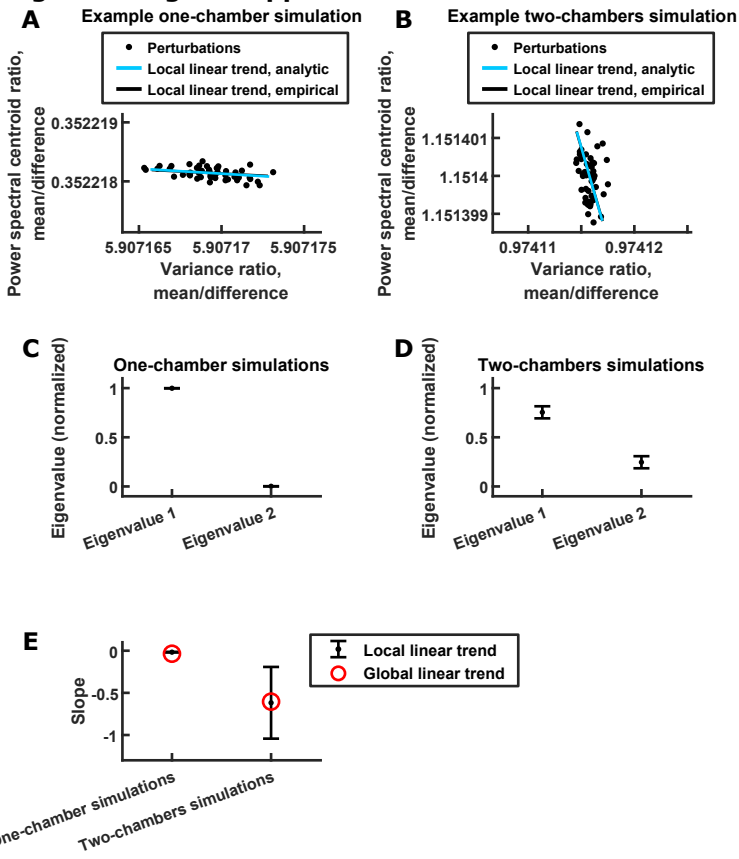

Supplement: supp [file elife_poa_e70493_Figure_5_figure_supplement_1.pdf › elife_poa_e70493_Figure_5_figure_supplement_1.pdf]
